# Supplementary material
Source: Springer Nature journal article supplement (https://www.springermedizin.de/resource/supplementary/13054_2010_8346_MOESM3_ESM.pdf/9731760)

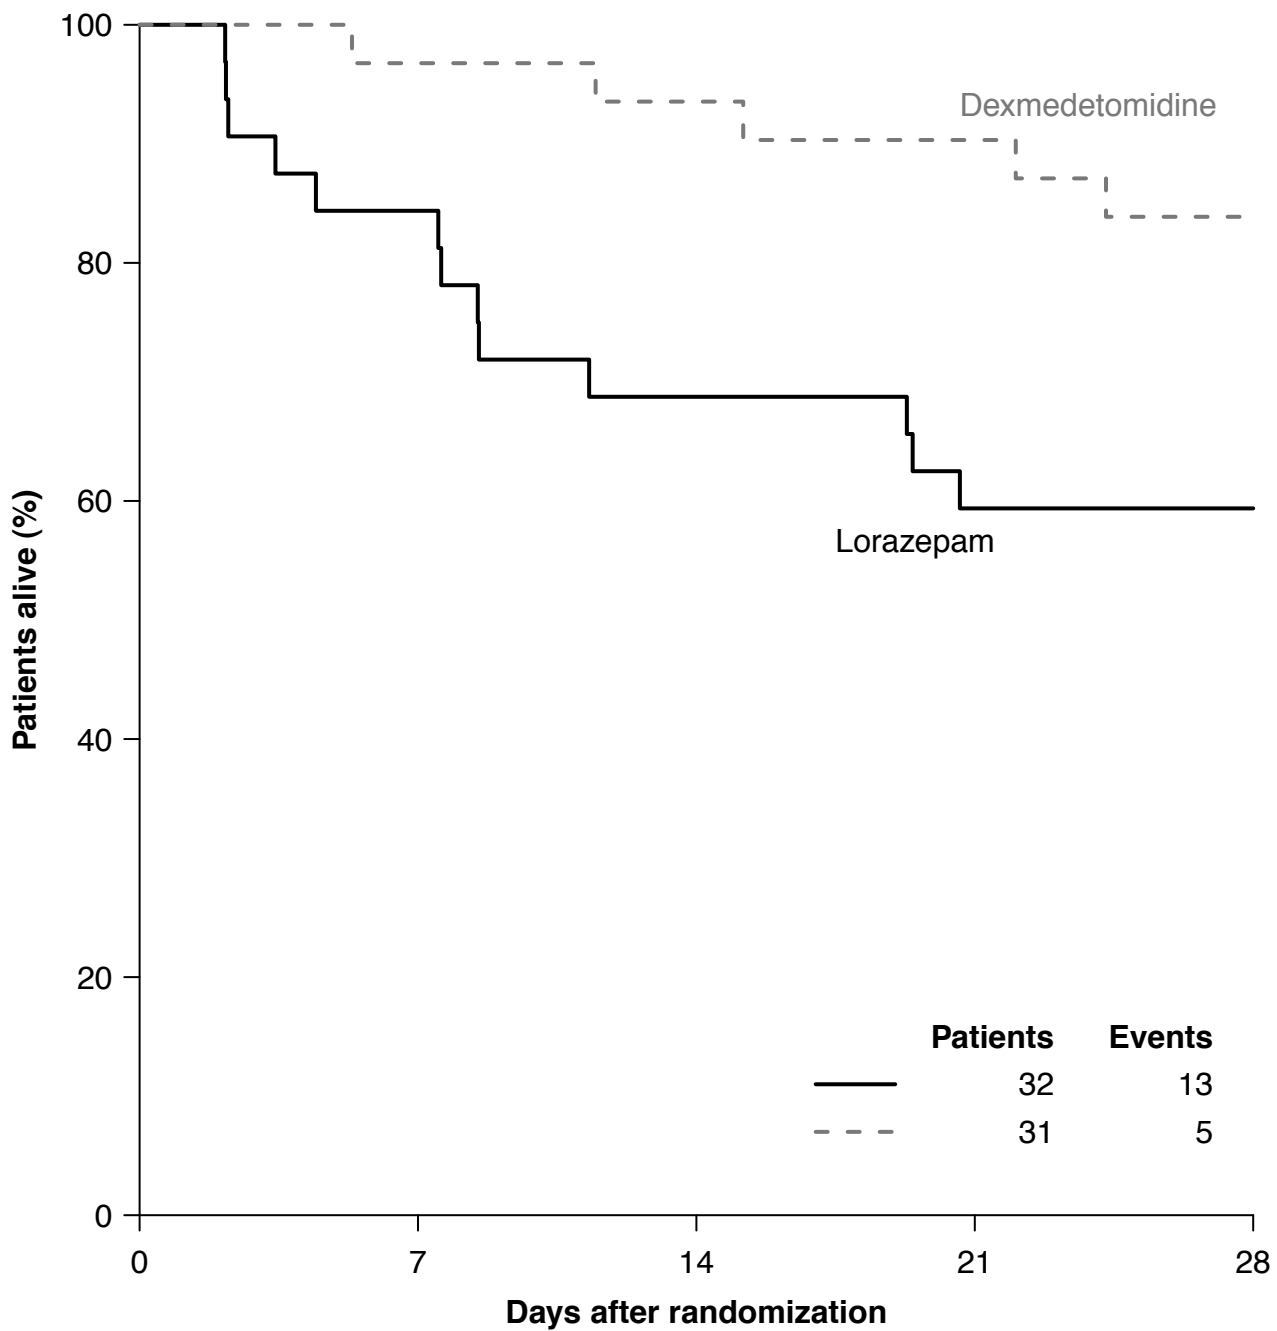

**Patients at Risk**

|                 |    |    |    |    |    |
|-----------------|----|----|----|----|----|
| Dexmedetomidine | 32 | 27 | 22 | 19 | 19 |
| Lorazepam       | 31 | 30 | 29 | 28 | 26 |

Supplement: MOESM3 [file 9731760]
